# Supplementary material for: Distinct roles of ORAI1 in T cell–mediated allergic airway inflammation and immunity to influenza A virus infection
Source: PubMed Central journal article supplement — Sci Adv. 2022 Oct 7;8(40):eabn6552. doi: 10.1126/sciadv.abn6552 (PMC9544339; doi:10.1126/sciadv.abn6552), 2022-10-07
Supplement: sciadv.abn6552_sm.pdf [file sciadv.abn6552_sm.pdf]

Supplementary Materials for  
**Distinct roles of ORAI1 in T cell–mediated allergic airway inflammation and immunity to influenza A virus infection**

Yin-Hu Wang *et al.*

Corresponding author: Stefan Feske, feskes01@nyumc.org

*Sci. Adv.* **8**, eabn6552 (2022)  
DOI: 10.1126/sciadv.abn6552

**This PDF file includes:**

Figs. S1 to S10  
Tables S1 to S3

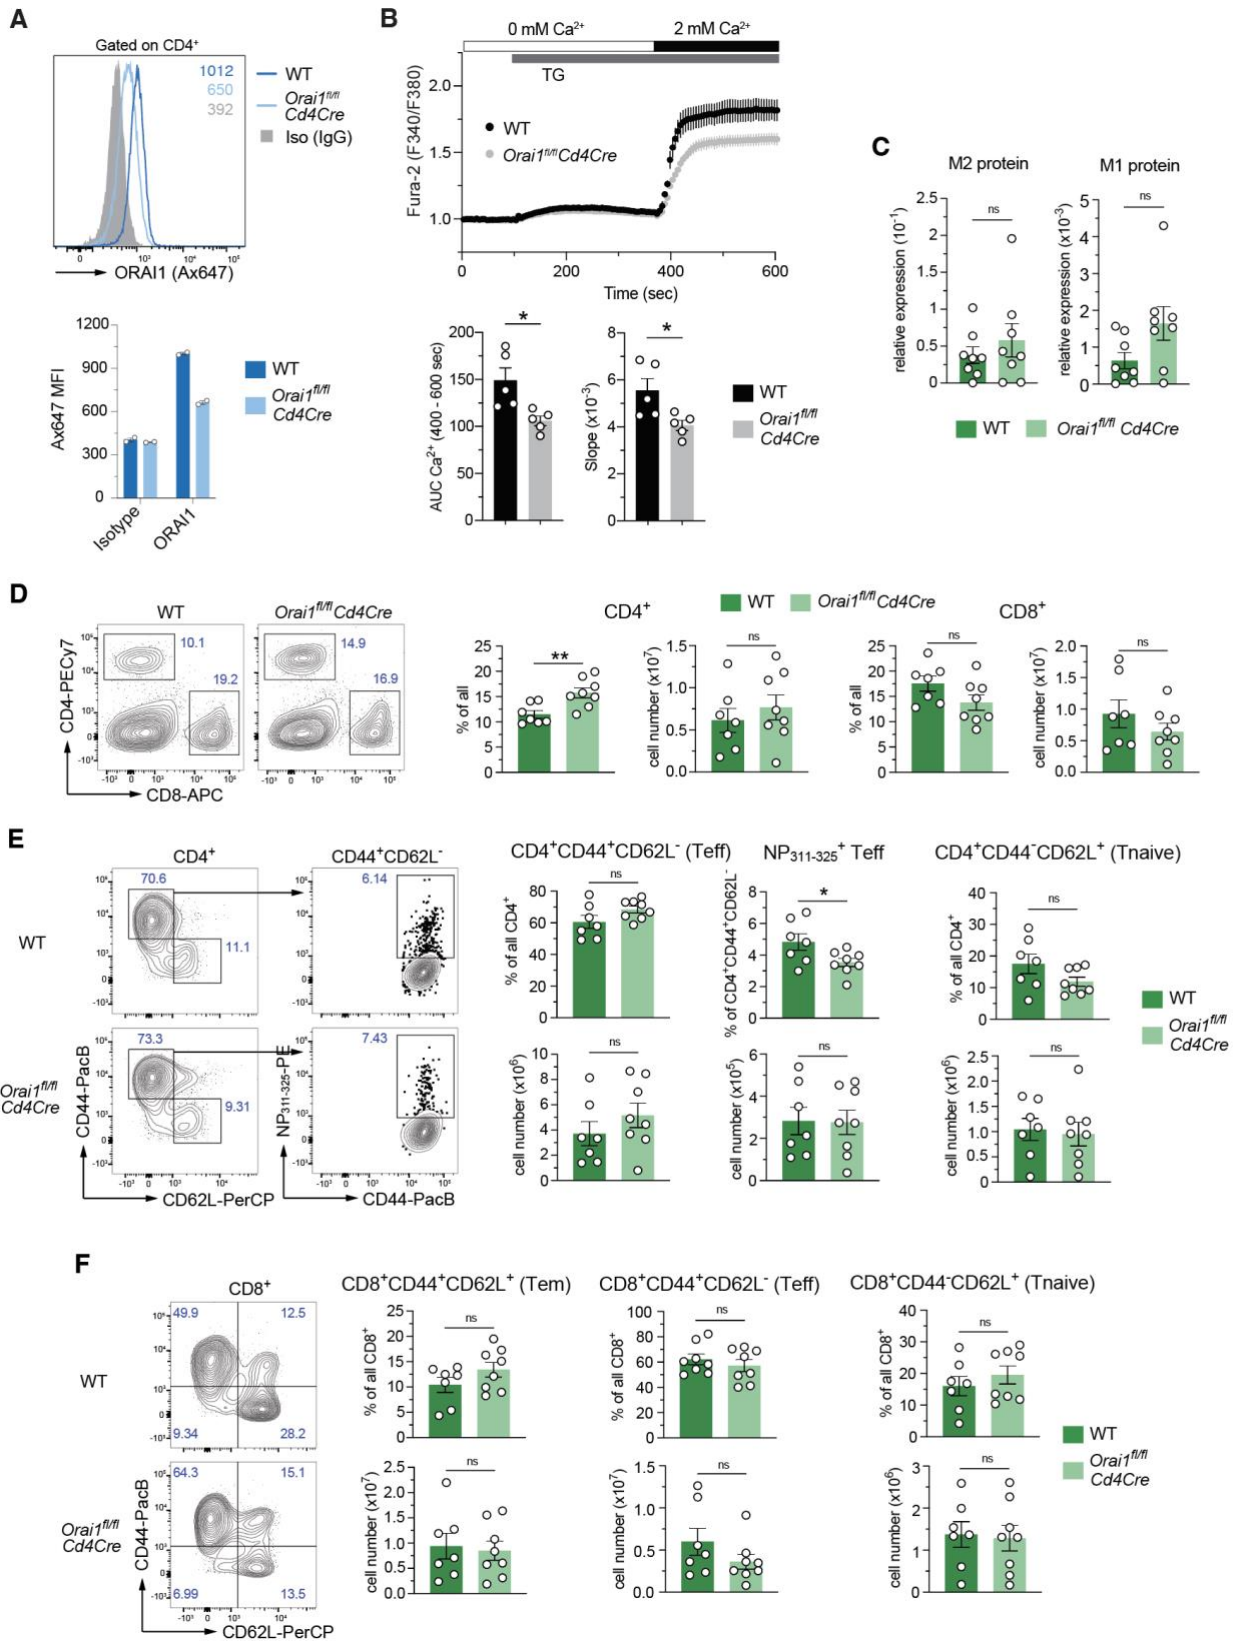

**Supplementary Figure 1. Intact T cell mediated Ca immune response to influenza A virus infection in mice with T cell-specific deletion of *Orai1*.** **A**, Representative flow cytometry plots and quantification of ORAI1 protein levels in *in vitro* differentiated Th2 cells from WT and *Orai1<sup>fl/fl</sup>Cd4Cre* mice. Cell were

incubated with affinity-purified rabbit-anti-human ORAI1 antibody or rabbit IgG as isotype (iso) control. Data are representative of two repeat experiments. **B**, Cytosolic  $\text{Ca}^{2+}$  levels in naïve  $\text{CD4}^+$  T cells isolated from the spleen of WT and *Orai1<sup>fl/fl</sup>Cd4Cre* mice. T cells were loaded with Fura-2 and stimulated with 1  $\mu\text{M}$  thapsigargin (TG) in  $\text{Ca}^{2+}$  free Ringer solution, followed by perfusion with 2 mM extracellular  $\text{Ca}^{2+}$ . Quantification of the area under the curve (AUC) and the slope of  $\text{Ca}^{2+}$  influx after  $\text{Ca}^{2+}$  readdition. Data are the mean  $\pm$  SEM from 5 mice per genotype, pooled from 3 independent experiments. **C**, qRT-PCR analysis of IAV levels in total lung tissue from WT versus *Orai1<sup>fl/fl</sup>Cd4Cre* mice at day 9 after infection with the x31 (H3N2) strain of influenza A virus (IAV). M2 and M1 proteins represent different genomic regions of IAV. **D**, Representative flow cytometry plots, frequencies and total numbers of  $\text{CD4}^+$  and  $\text{CD8}^+$  T cells in the lungs of WT and *Orai1<sup>fl/fl</sup>Cd4Cre* mice 9 days after IAV infection. **E**, Representative flow cytometry plots, frequencies and numbers of total and IAV-specific (NP311-325 tetramer positive)  $\text{CD44}^+\text{CD62L}^-$  effector (Teff) and  $\text{CD44}^-\text{CD62L}^+$  naïve (Tnaive)  $\text{CD4}^+$  T cells in lungs of WT and *Orai1<sup>fl/fl</sup>Cd4Cre* mice at day 9 after IAV infection. **F**, Representative flow cytometry plots, frequencies and numbers of  $\text{CD44}^+\text{CD62L}^+$  effector memory (Tem),  $\text{CD44}^+\text{CD62L}^-$  effector (Teff) and  $\text{CD44}^-\text{CD62L}^+$  naïve (Tnaive)  $\text{CD8}^+$  T cells in lungs of WT and *Orai1<sup>fl/fl</sup>Cd4Cre* mice at day 9 after IAV infection. Data in C are the mean  $\pm$  SEM of 8 mice per cohort from 2 independent experiments. Data in D, E, F are the mean  $\pm$  SEM from 7-8 mice per cohort from 2 independent experiments. Statistical analysis by paired (A) or unpaired (C-F) Student's t-test with the following significance levels: \*\*\* $p < 0.001$  \*\* $p < 0.01$  \* $p < 0.05$ . ns, not significant.

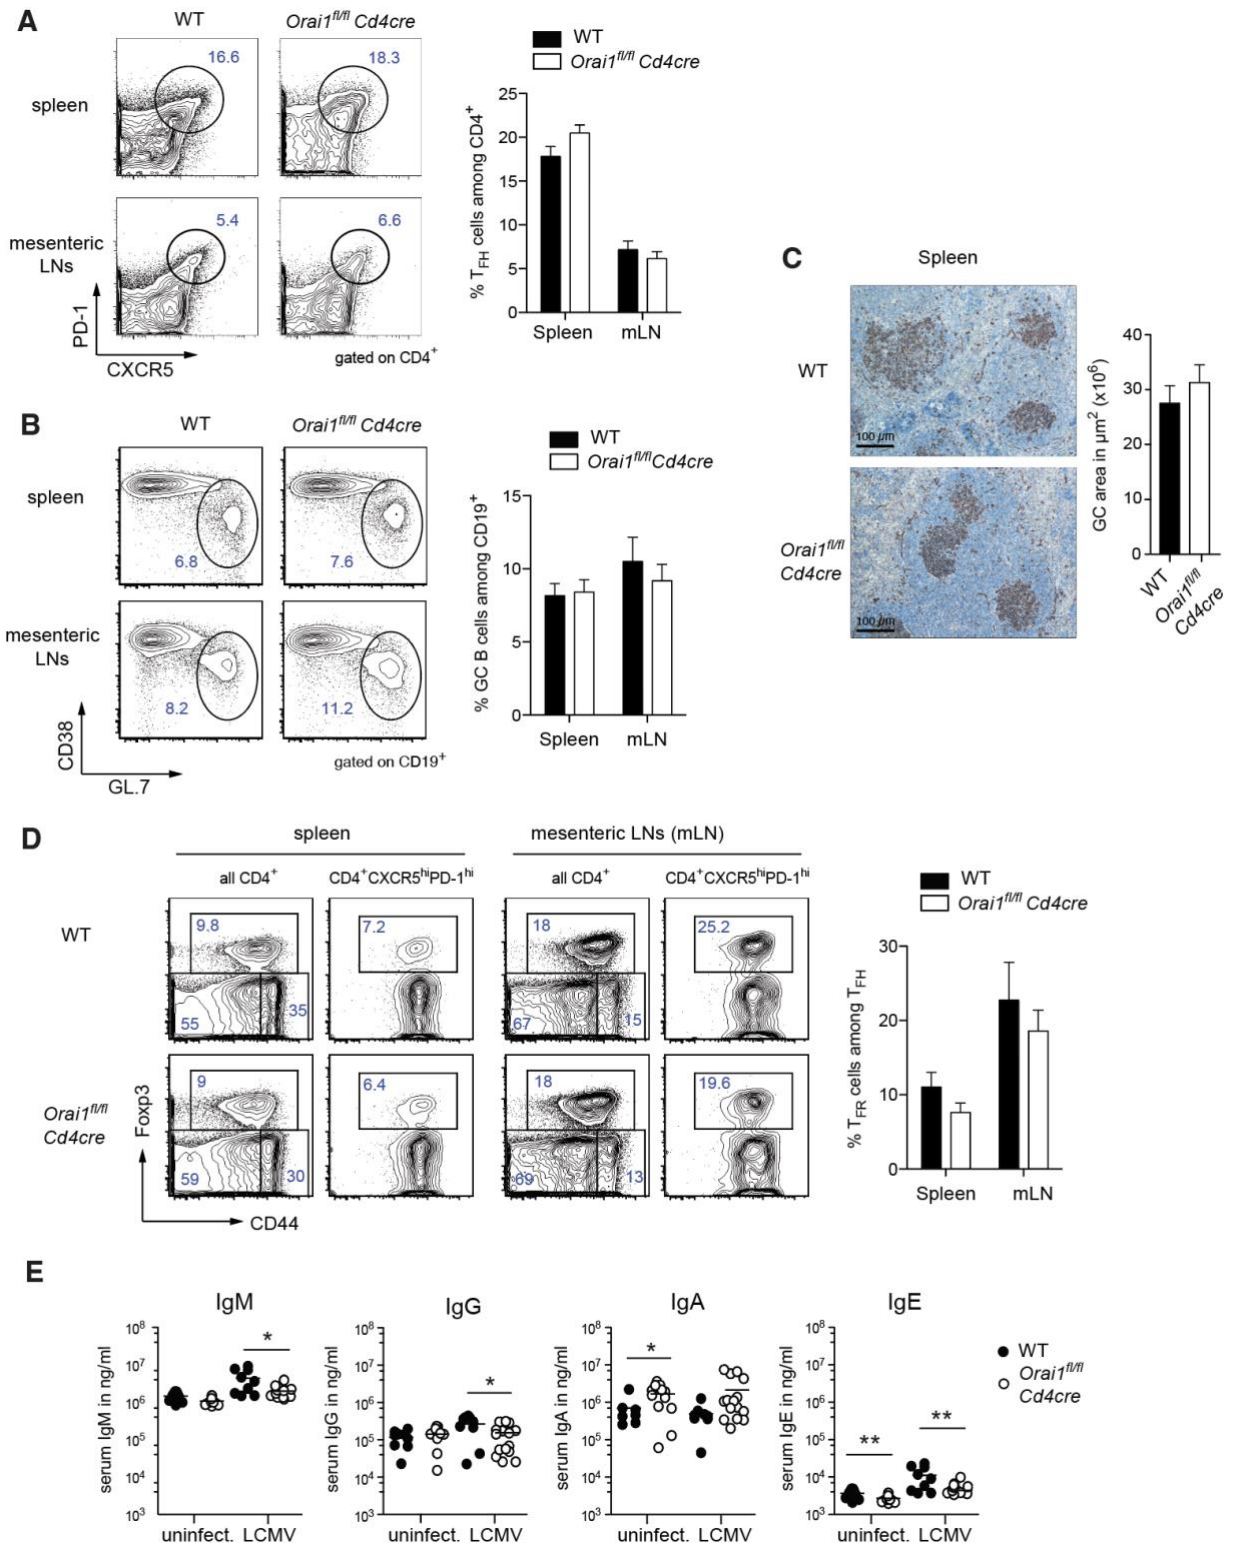

**Supplementary Figure 2. T cell-specific deletion of *Orai1* does not impair adaptive immune responses to infection with lymphocytic choriomeningitis virus (LCMV).** **A**, Frequencies of CD4<sup>+</sup>PD-1<sup>hi</sup>CXCR5<sup>hi</sup> T follicular helper (T<sub>FH</sub>) cells in the spleens and mesenteric LNs (mLNs) of WT and *Orai1<sup>fl/fl</sup>Cd4Cre* mice 10 days after infection with the Armstrong strain of LCMV. Data represent the mean ± SEM of 12-18 mice per group. **B**, Frequencies of CD19<sup>+</sup>CD38<sup>+</sup>GL-7<sup>+</sup> germinal center (GC) B cells in the spleens and mLNs of WT and *Orai1<sup>fl/fl</sup>Cd4Cre* mice at day 10 p.i. Data are the mean ± SEM of 16-23 mice

per group. **C**, Representative immunohistochemistry staining for peanut agglutinin (PNA) of the spleens of WT and *Orai1<sup>fl/fl</sup>Cd4Cre* mice 10 days after LCMV infection. **D**, Frequencies of CD4<sup>+</sup>PD-1<sup>hi</sup>CXCR5<sup>hi</sup>CD44<sup>hi</sup>FoxP3<sup>+</sup> T follicular regulatory (Tfr) cells in the spleens and mLN of WT and *Orai1<sup>fl/fl</sup>Cd4Cre* mice at day 10 p.i. Data are the mean  $\pm$  SEM of 12-16 mice per group. **E**, Total serum levels of IgM, IgG, IgA and IgE in WT and *Orai1<sup>fl/fl</sup>Cd4Cre* mice before and 10 days after LCMV infection. Data are the mean  $\pm$  SEM of 7-15 individual serum samples. Statistical analysis by unpaired Student's t-test with the following significance levels: \* $p$ <0.05, \*\* $p$ <0.01.

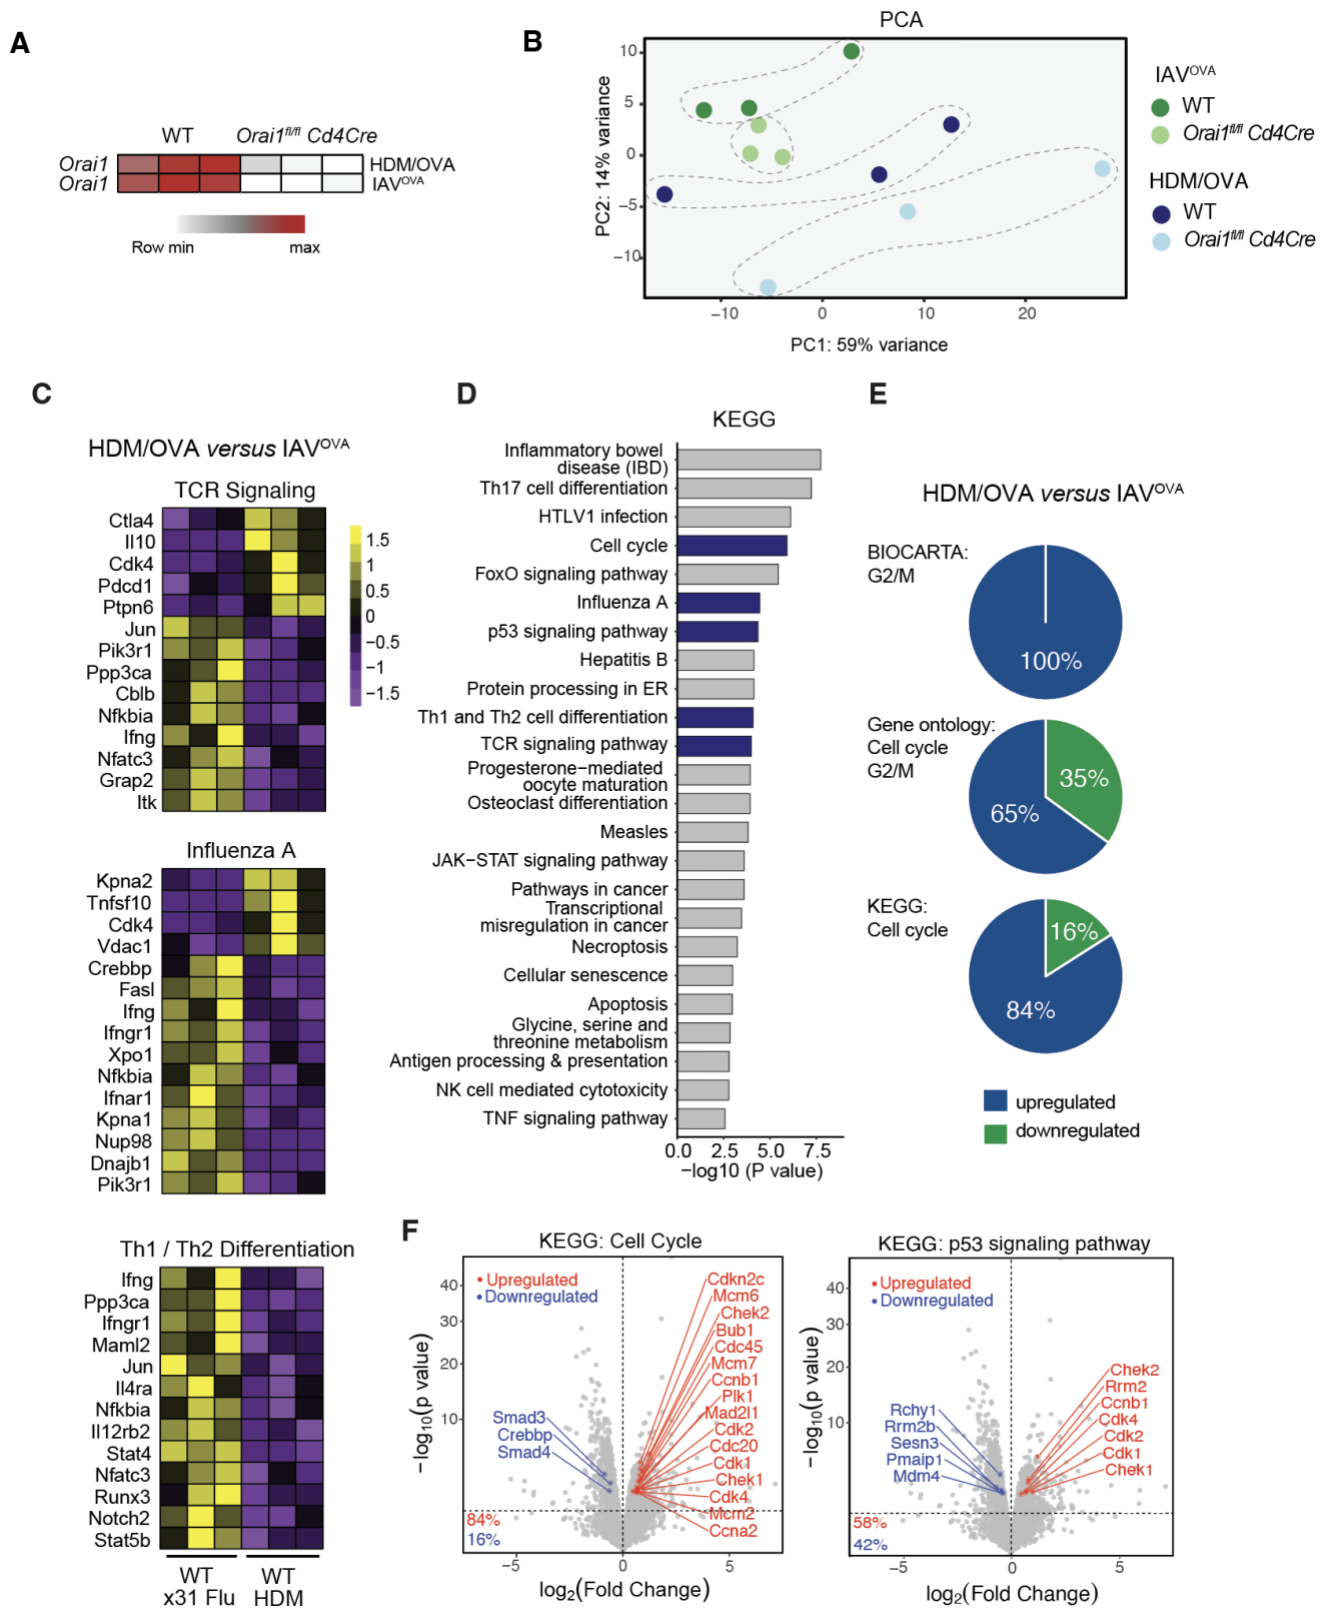

**Supplementary Figure 3. ORAI1 regulates differential expression of cell cycle-associated genes in CD4<sup>+</sup> T cells after induction of allergic airway inflammation by HDM/OVA. A-B, RNA-Seq analysis of differentially expressed genes (DEG) in CD4<sup>+</sup> T cells of WT OT-II and *Orai1<sup>fl/fl</sup> Cd4Cre* OT-II donor mice in**

response to HDM/OVA immunization and IAV<sup>OVA</sup> infection. The experimental designs are shown in Figure 3A,B. **A**, Heatmap showing normalized *Orai1* mRNA expression in CD4<sup>+</sup> T cells after HDM/OVA immunization or IAV<sup>OVA</sup> infection. **B**, Principal component analysis (PCA) of the indicated groups. **C**, Heatmaps comparing expression of genes contained in the KEGG pathways *TCR signaling*, *Influenza A* and *Th1/Th2 Differentiation* in WT OT-II T cells after IAV<sup>OVA</sup> infection and HDM/OVA treatment. **D**, Differentially regulated KEGG pathways in OT-II T cells from IAV<sup>OVA</sup> infected and HDM/OVA treated mice ranked by the  $-\log_{10}$  of *p* values. Statistical analysis by Fisher's exact test:  $p < 0.1$ . **E**, Percentage of up- and downregulated genes in the BIOCARTA pathway *Cell cycle G2M Checkpoint*, the Gene ontology pathway *Cell cycle G2/M* and the KEGG pathway *Cell cycle* in OT-II T cells from IAV<sup>OVA</sup> infected and HDM/OVA treated mice. **F**, Differentially expressed genes (DEG) in OT-II T cells from IAV<sup>OVA</sup> infected and HDM/OVA treated mice. DEG belonging to the KEGG pathways *Cell cycle* and *p53 signaling* that are up- and downregulated are indicated in red and blue, respectively. Data are from WT OT-II and *Orai1<sup>fl/fl</sup>Cd4Cre* OT-II donor T cells isolated from 3 IAV<sup>OVA</sup>-infected and 3 HDM/OVA-treated TCR $\alpha^{-/-}$  mice. Statistical analysis in D and F by Fisher's exact test using a *p* value cut-off  $< 0.1$ .

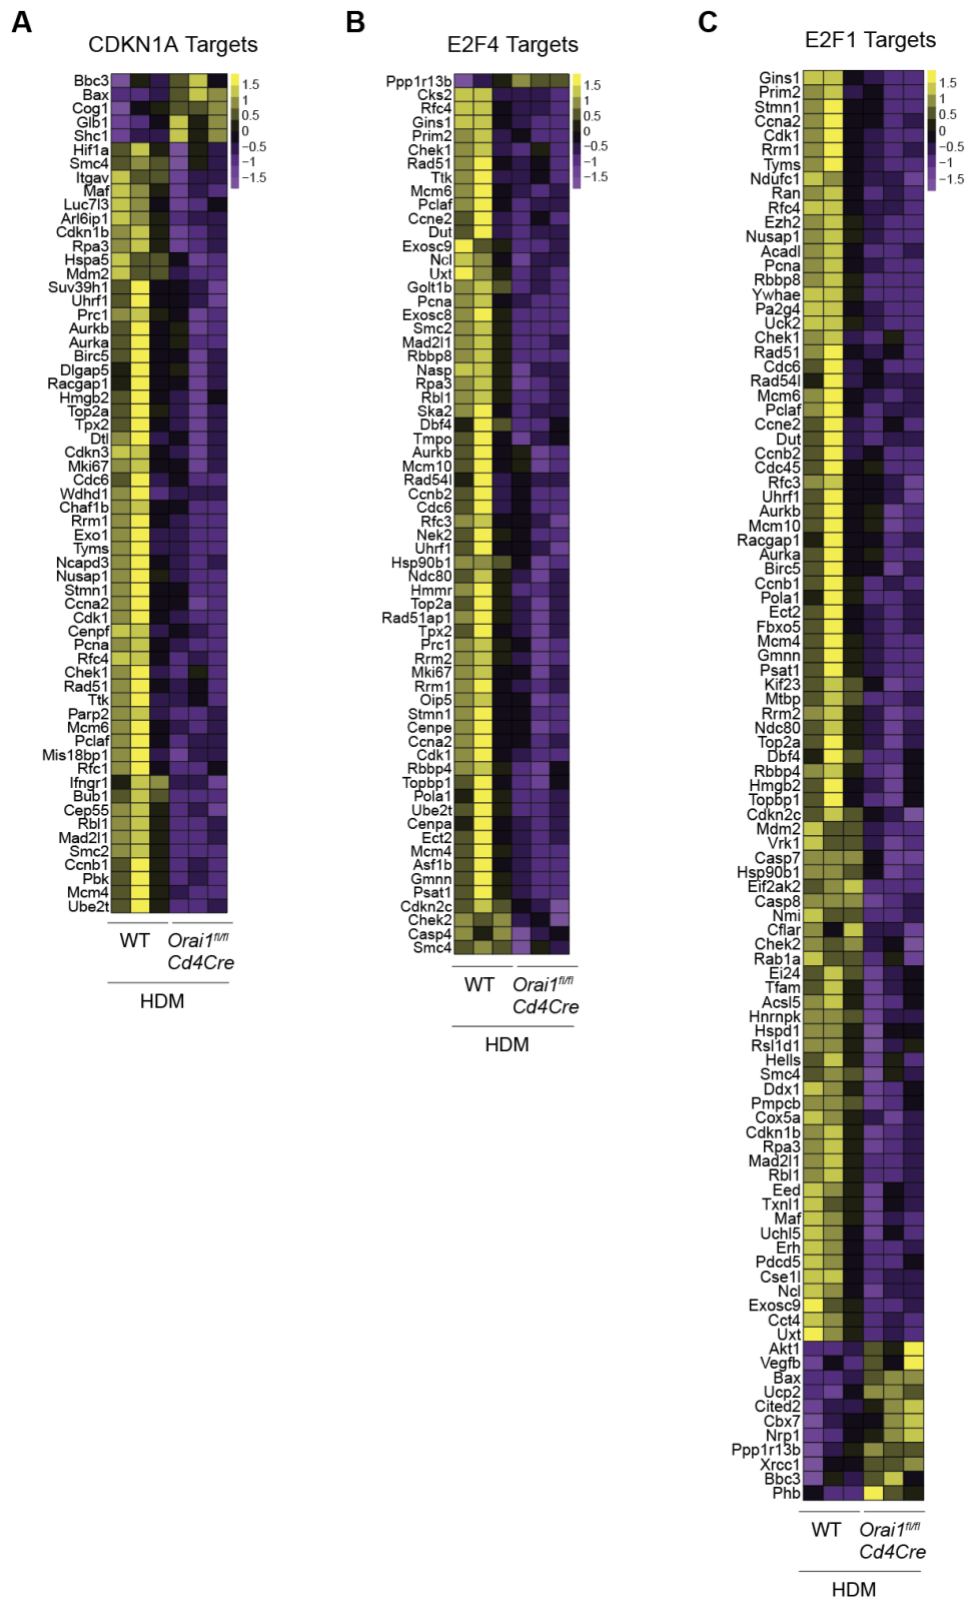

**Supplementary Figure 4. ORAI1 regulates differential expression of targets genes of the cell cycle-regulators CDKN1A, E2F4 and E2F1 in pulmonary CD4<sup>+</sup> T cells after immunization with HDM/OVA.** RNA-Seq data are from the same experiment described in Supplementary Fig.4. Heatmaps of DEG regulated by CDKN1A (A), E2F4 (B) and E2F1 (C) in WT and *Orai1*-deficient CD4<sup>+</sup> T cells after HDM/OVA immunization. Colors represent the Z score expression relative to average expression per row.



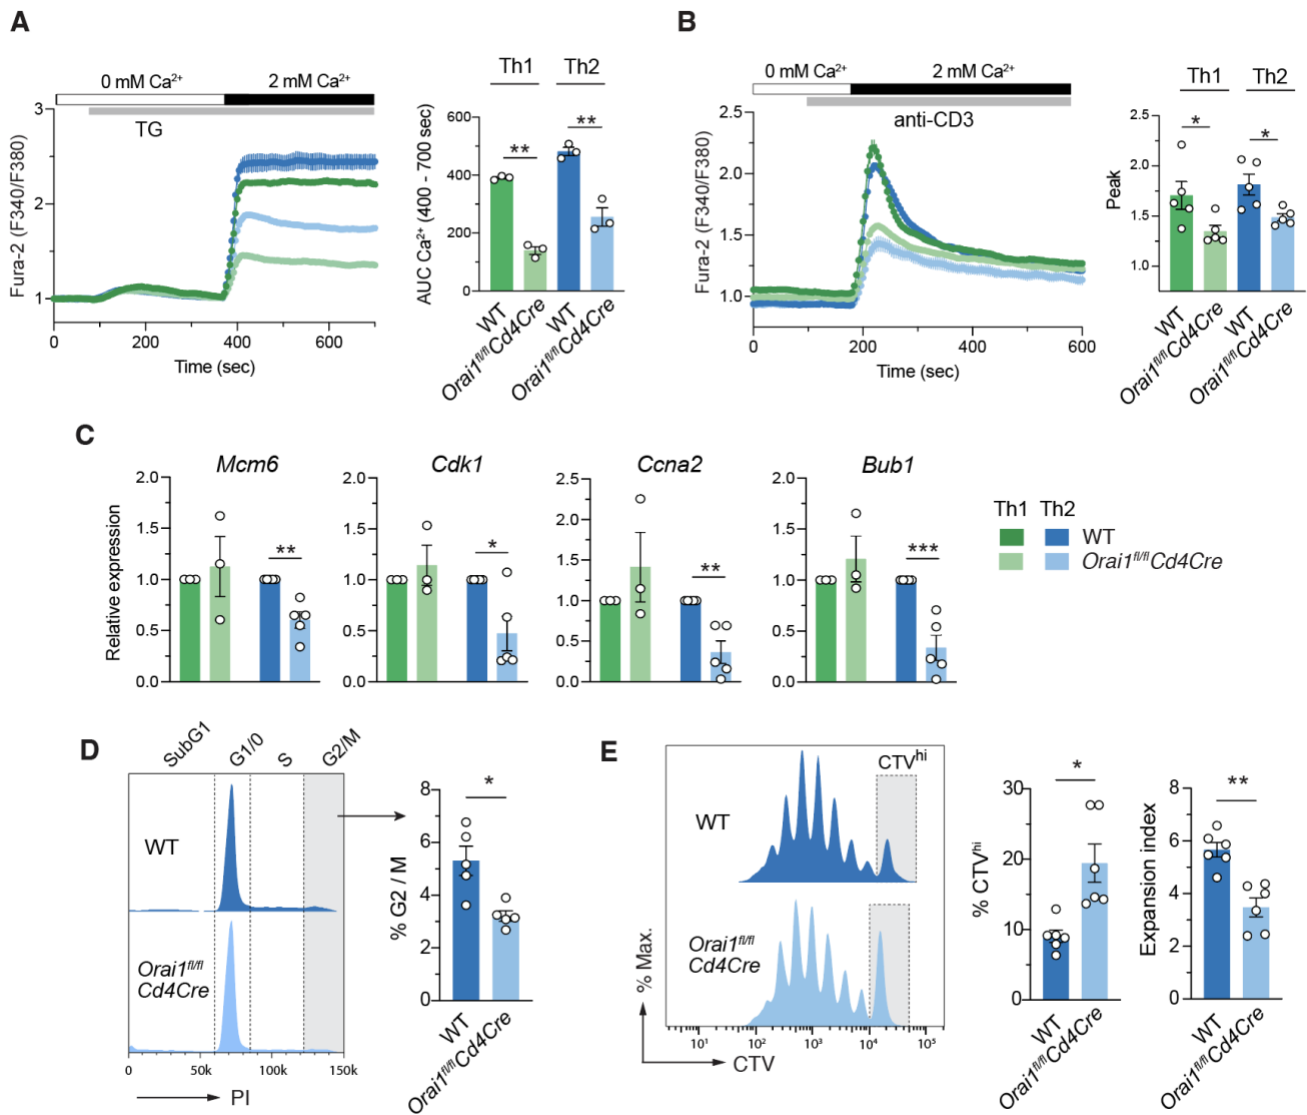

**Supplementary Figure 5. ORAI1 regulates the expression of cell cycle-regulating genes and the proliferation of Th2 cells.** **A-B**, Cytosolic Ca<sup>2+</sup> levels in Th1 and Th2 cells derived from CD4<sup>+</sup> T cells of WT and *Orai1<sup>fl/fl</sup>*Cd4Cre mice. T cells were loaded with Fura-2 and stimulated with 1 μM thapsigargin (TG) (**A**) or anti-CD3 crosslinking (**B**) in Ca<sup>2+</sup> free Ringer solution, followed by readdition of 2 mM extracellular Ca<sup>2+</sup>. Quantification of the area under the curve (AUC, in **A**) or peak (**B**) following Ca<sup>2+</sup> readdition. **C**, Cell cycle-regulating genes identified by RNA-Seq were analyzed for mRNA levels by qRT-PCR in Th1 and Th2 cells of WT and *Orai1<sup>fl/fl</sup>*Cd4Cre mice at day 5 of *in vitro* polarization. Expression levels were normalized to *Rpl32* house keeping gene and WT T cells. **D**, Cell cycle analysis of WT and *Orai1<sup>fl/fl</sup>*Cd4Cre mice 3 days following stimulation with anti-CD3 and anti-CD28 dynabeads (T cell : dynabead ratio of 1:4) in the presence of IL-4 and anti-IFN $\gamma$ . Cells were stained with propidium iodide on day 3 post-stimulation. **E**, Proliferation of Th2 cells of WT and *Orai1<sup>fl/fl</sup>*Cd4Cre mice following stimulation as in (C). T cells were loaded with CellTrace Violet (CTV) and analyzed at day 4 post-stimulation. Data in A-E are the mean  $\pm$  SEM from 3-6 mice per genotype, pooled from 3-4 independent experiments. Statistical analysis by paired (A,B,D,E) or unpaired (C) Student's t-test with the following significance levels: \*\*\* $p$ <0.001 \*\* $p$ <0.01 \* $p$ <0.05.

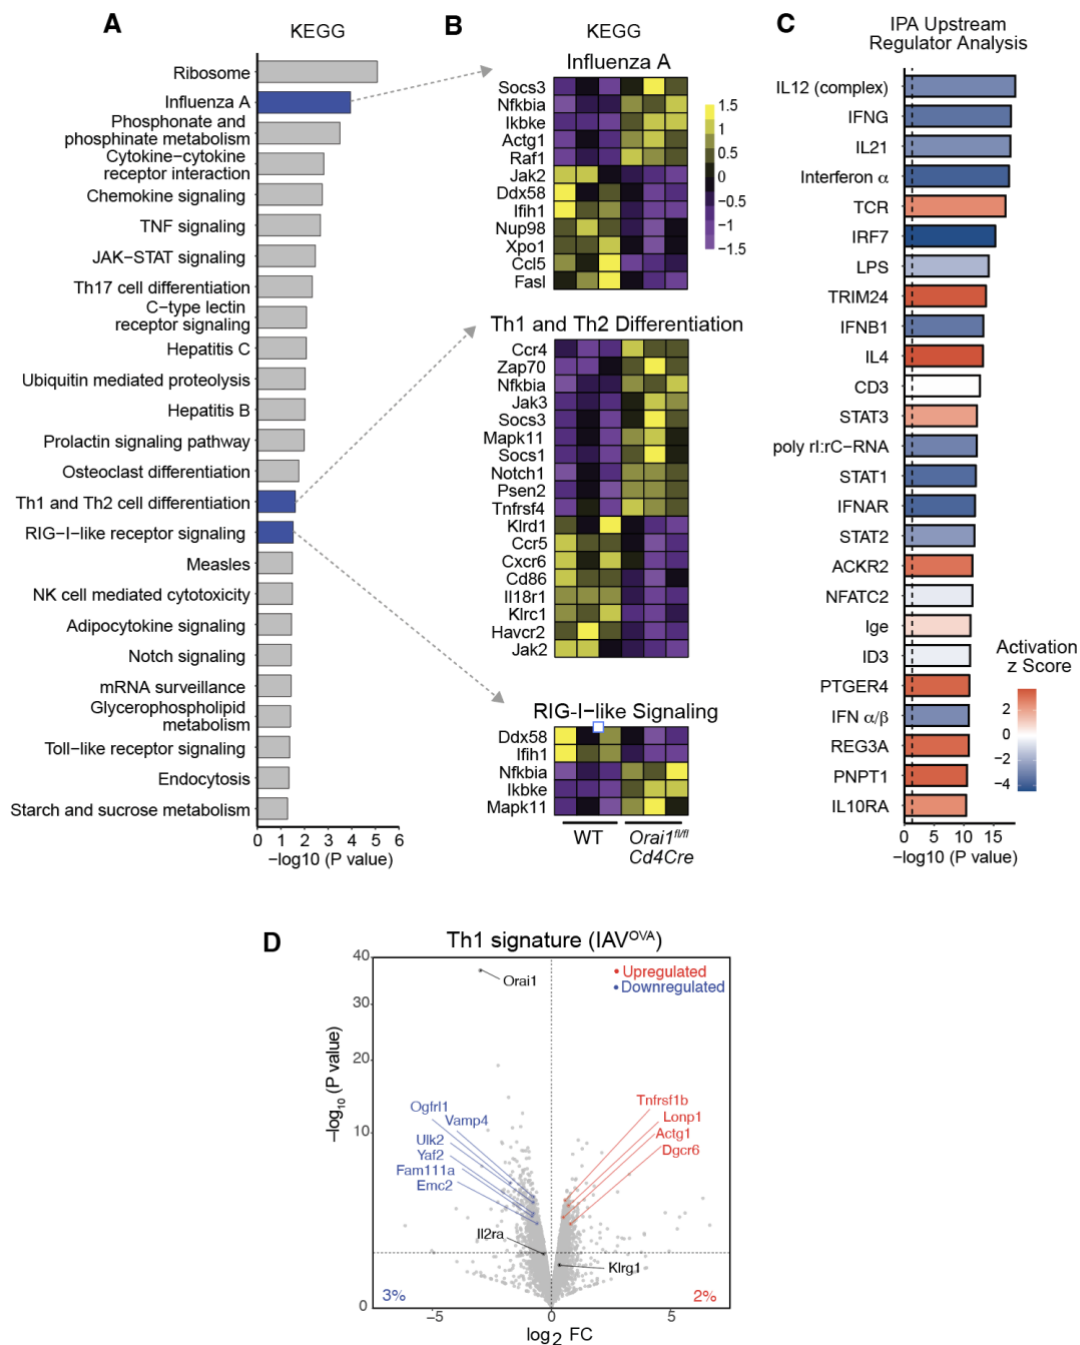

**Supplementary Figure 6. Dysregulated gene expression and signaling pathways in *Orai1*-deficient T cells after IAV infection.** Analysis of differentially expressed genes (DEG) and pathways in WT OT-II and *Orai1<sup>fl/fl</sup> Cd4Cre* OT-II donor CD4<sup>+</sup> T cells isolated from TCR $\alpha^{-/-}$  recipient mice following IAV<sup>OVA</sup> infection. The experimental design is shown in Figure 3A. **A**, KEGG pathway analysis comparing WT and *Orai1*-deficient T cells. Shown are the top 25 deregulated pathways ranked by  $p$  value. **B**, Heatmaps of DEG included in the KEGG pathways *Influenza A*, *Th1/Th2 Differentiation* and *RIG-I-like Signaling* shown in (A). **C**, IPA Upstream Regulator Analysis of DEG in WT OT-II and *Orai1<sup>fl/fl</sup> Cd4Cre* OT-II CD4<sup>+</sup> T cells after IAV<sup>OVA</sup> infection. Upstream regulators are ranked by  $p$  value. Colors indicate the activation Z score. **D**, Volcano plot of DEG (in gray) in WT OT-II and *Orai1<sup>fl/fl</sup> Cd4Cre* OT-II CD4<sup>+</sup> T cells following infection with IAV<sup>OVA</sup>. DEG belonging to the Th1 signature *Th1 vs naive CD4 Tcell up* (M3376) published in (76) that are upregulated in *Orai1*-deficient T cells are indicated in red; downregulated DEG are shown in blue. Data in A-D are from 3 IAV<sup>OVA</sup> infected mice per cohort. Statistical analysis in A and C by Fisher's exact test using a  $p$  value cut-off < 0.1.

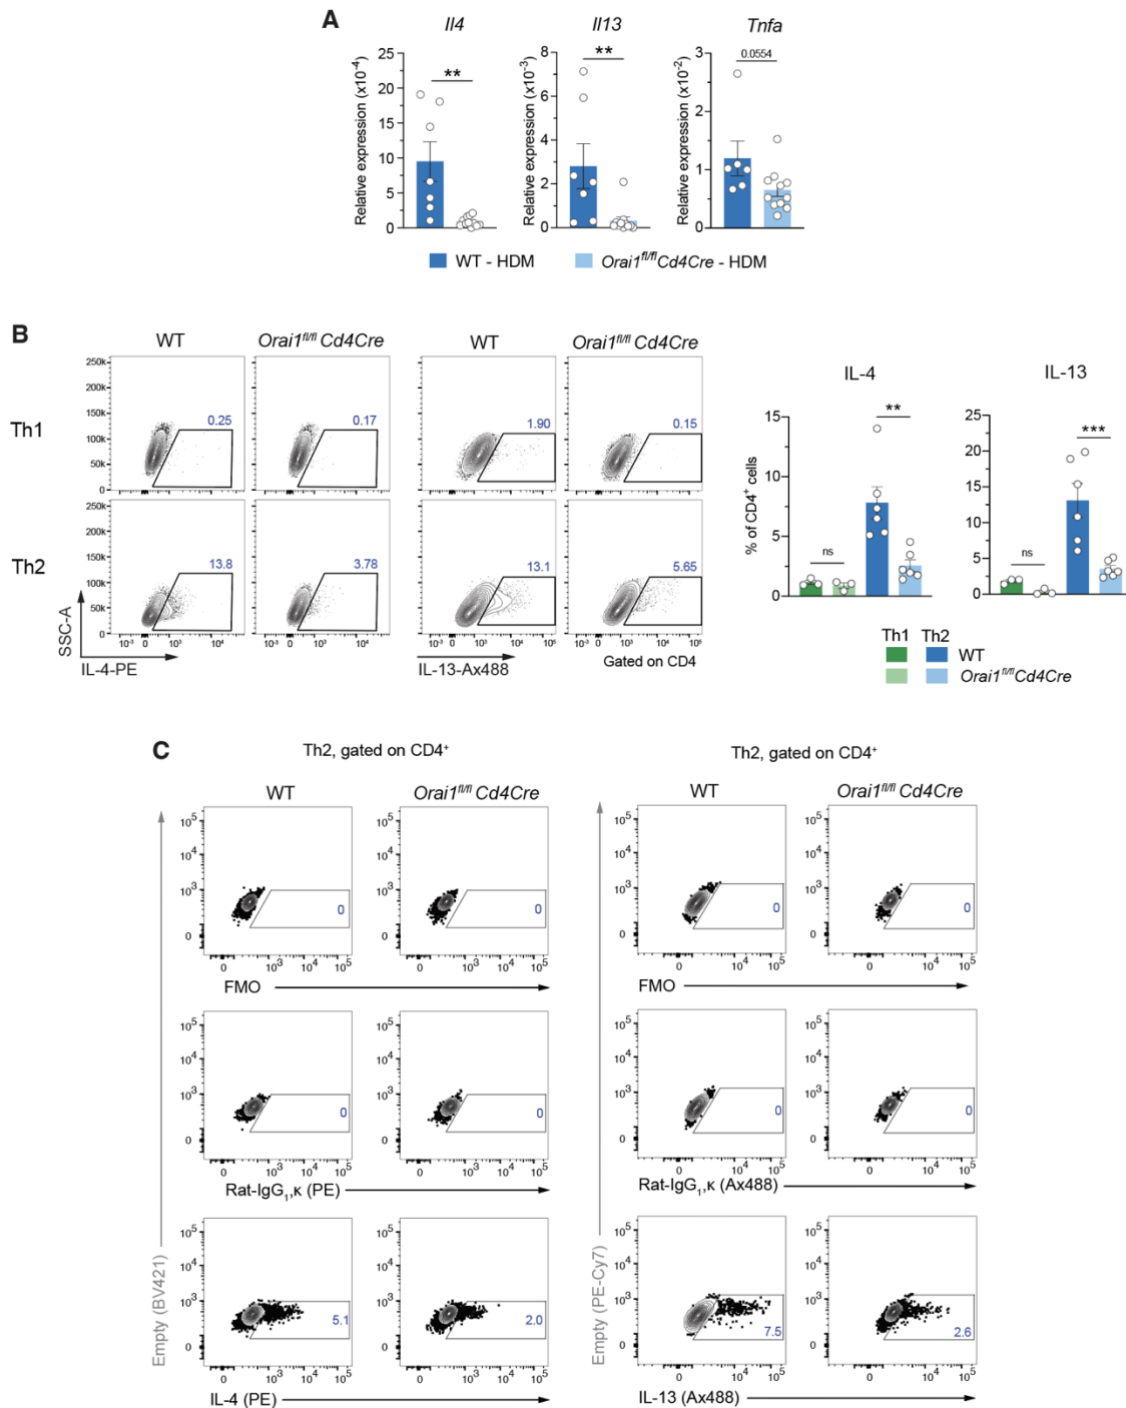

**Supplementary Figure 7. ORAI1 is required for the production of cytokines by Th2 cells *in vitro* and *in vivo*.** **A**, Expression of cytokine genes in whole lung tissue of WT and *Orai1<sup>fl/fl</sup>*Cd4Cre mice after HDM challenge analyzed by qRT-PCR. **B**, Representative flow cytometry plots and frequencies of intracellular IL-4 and IL-13 cytokine staining in CD4<sup>+</sup> T cells of WT and *Orai1<sup>fl/fl</sup>*Cd4Cre mice that were polarized into Th1 and Th2 cells *in vitro* and analyzed after 5 days and stimulation with PMA/ionomycin for 4h. **C**, Representative flow cytometry plots of IL-4 and IL-13 production by CD4<sup>+</sup> T cells from WT and *Orai1<sup>fl/fl</sup>*Cd4Cre mice that were differentiated into Th2 cells for 5 days *in vitro* and stimulated with PMA/ionomycin for 4h. The isotype control antibodies are rat IgG<sub>1,κ</sub> conjugated with PE or Ax488. Fluorescence minus one (FMO) was determined by staining with anti-CD4 (APC-Cy7), and LIVE/DEAD™ Fixable Blue Dead Cell Stain without either anti-IL-4 or anti-IL-13. Data are the mean ± SEM of 3-6 mice per genotype from at least 3 independent experiments. Statistical analysis by unpaired Student's t-test with the following significance levels: \*\*\**p* < 0.001; \*\**p* < 0.01; \**p* < 0.05.

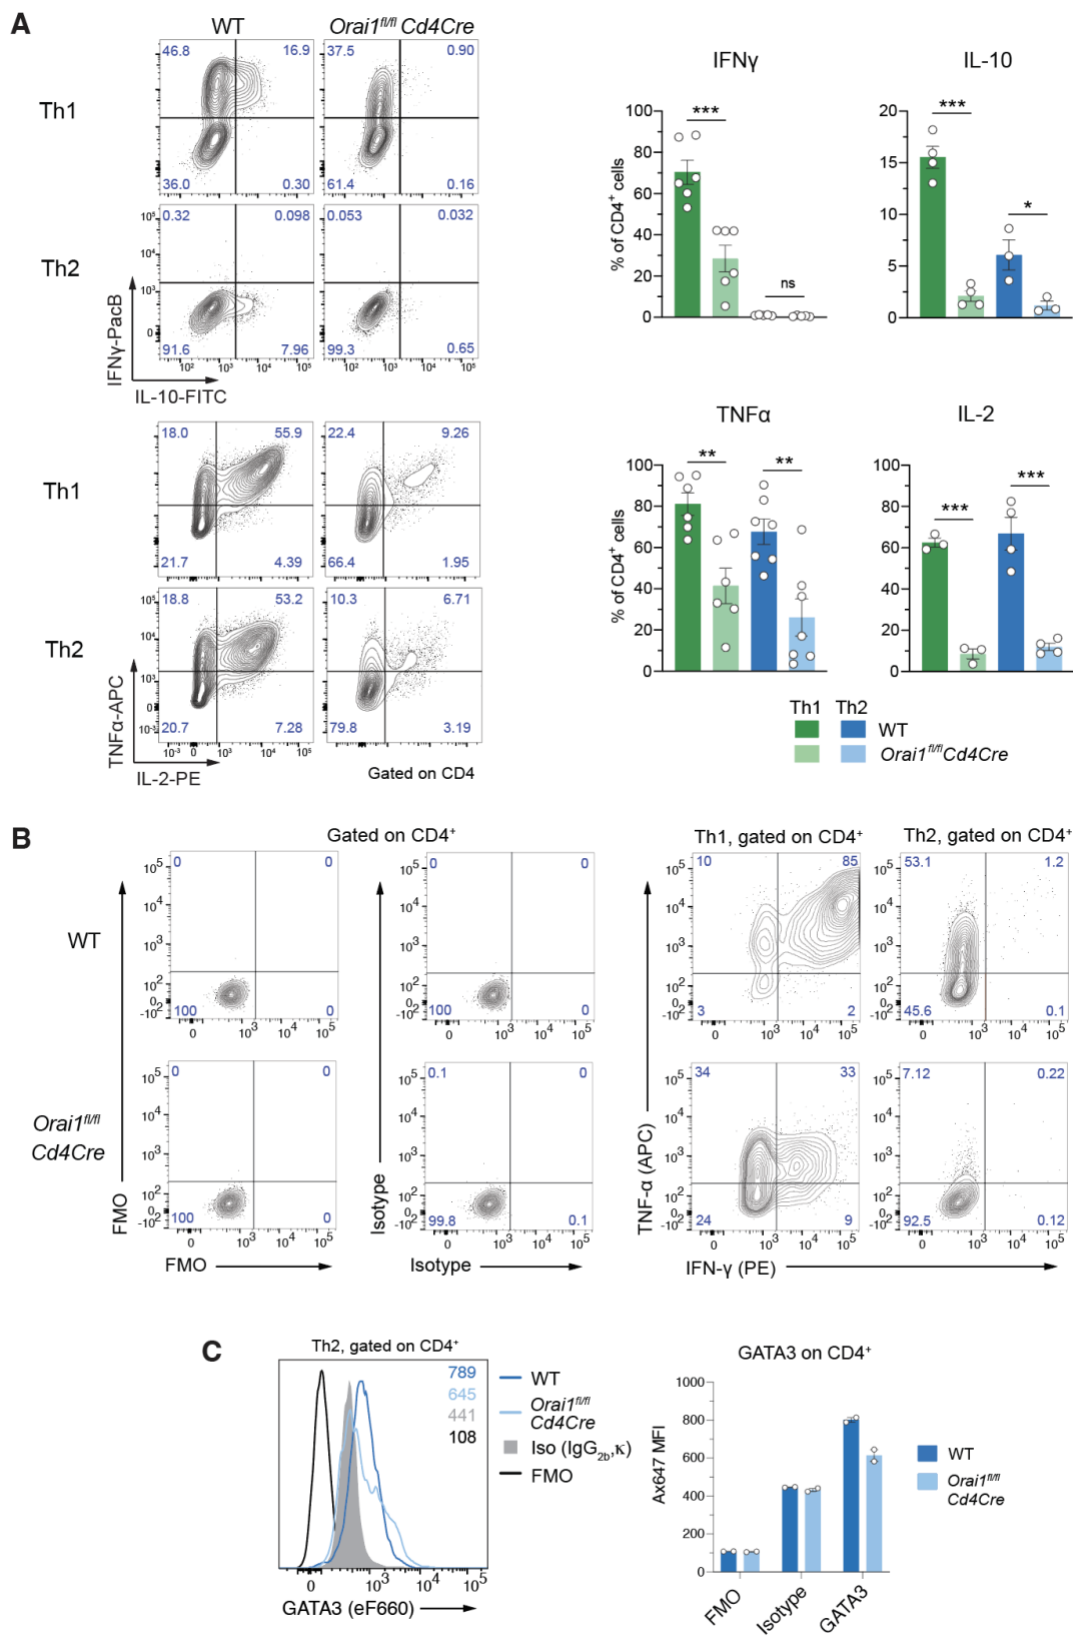

**Supplementary Figure 8. ORAI1 is required for cytokine production by Th1 and Th2 cells. A,** Representative flow cytometry plots and frequencies of IFN $\gamma$ , IL-10, TNF $\alpha$  and IL-2 producing CD4<sup>+</sup> Th1 and Th2 cells *in vitro* that were analyzed after 5 days of polarization *in vitro* and stimulation with PMA/ionomycin for 4h. **B,** Representative flow cytometry plots of TNF $\alpha$  and IFN $\gamma$  producing CD4<sup>+</sup> T cells

from WT and *Orai1<sup>fl/fl</sup>Cd4Cre* mice that were differentiated into Th1 and Th2 cells *in vitro* for 3 days. The isotype control for cytokine antibodies was rat IgG<sub>1,κ</sub> conjugated with APC or PE. FMO was determined by staining with anti-CD4 (APC-Cy7), and LIVE/DEAD™ Fixable Blue Dead Cell Stain without either anti-TNF-α or anti-IFN-γ. **C**, GATA3 protein levels in CD4<sup>+</sup> T cells from WT and *Orai1<sup>fl/fl</sup>Cd4Cre* mice that were differentiated into Th2 cells for 5 days *in vitro*. The isotype control for anti-GATA3 antibody is rat IgG<sub>2b,κ</sub> conjugated with eF660. FMO was determined by staining with anti-CD4 (APC-Cy7) antibody without anti-GATA3 (eF660). Data are the mean ± SEM of 3-7 mice per genotype from at least 3 independent experiments. Statistical analysis by unpaired Student's t-test with the following significance levels: \*\*\* $p < 0.001$ ; \*\* $p < 0.01$ ; \* $p < 0.05$ .

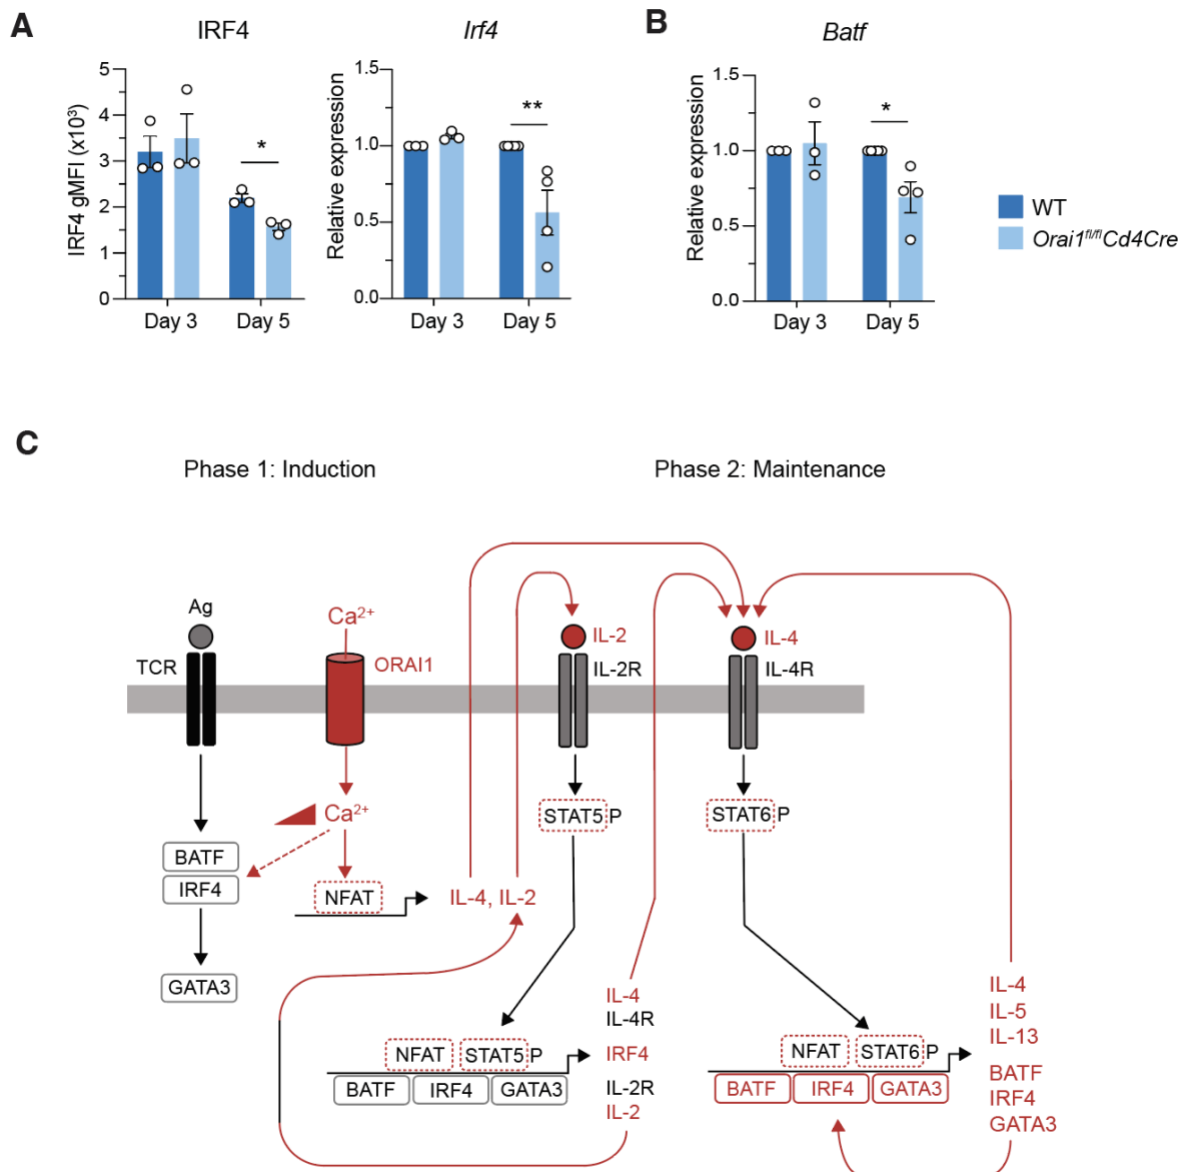

**Supplementary Figure 9. ORAI1 is required for the maintenance of GATA3, IRF4 and BATF expression by Th2 cells *in vitro*.** **A,B**, Analysis of IRF4 and BATF expression by CD4<sup>+</sup> T cells of WT and *Orai1<sup>fl/fl</sup>Cd4Cre* mice that were polarized into Th2 cells (IL-4, anti-IFN $\gamma$ ) *in vitro* and analyzed at days 3 and 5 in culture. **A**, Representative histogram plots and quantification of IRF4 protein levels (MFI) analyzed by flow cytometry (left) and *Irf4* mRNA expression analyzed by qRT-PCR (right), normalized to RPL32 and WT. **B**, *Batf* mRNA expression analyzed by qRT-PCR, normalized to *Rpl32* house keeping gene and WT T cells. Data in A and B are the mean  $\pm$  SEM of 3-4 mice per genotype from at least 3 representative experiments. Statistical analysis by 2-way ANOVA with Sidak's multiple comparison (mRNA in A,B) and paired Student's t-test (protein in A). \*\*\* $p < 0.001$  \*\* $p < 0.01$  \* $p < 0.05$ . **C**, Proposed model of the effects of ORAI1 and SOCE on Th2 cell differentiation and maintenance. Cytokines, transcription factors and pathways shown in red are decreased in the absence of ORAI1. Dashed red boxes indicate molecules whose function is presumed to be impaired but that were not measured directly. The red triangle and dashed line downstream of Ca<sup>2+</sup> indicate that BATF and IRF4 expression requires SOCE as shown in (9) but is not impaired in the absence of ORAI1 and partial reduction of SOCE during initial T cell activation.

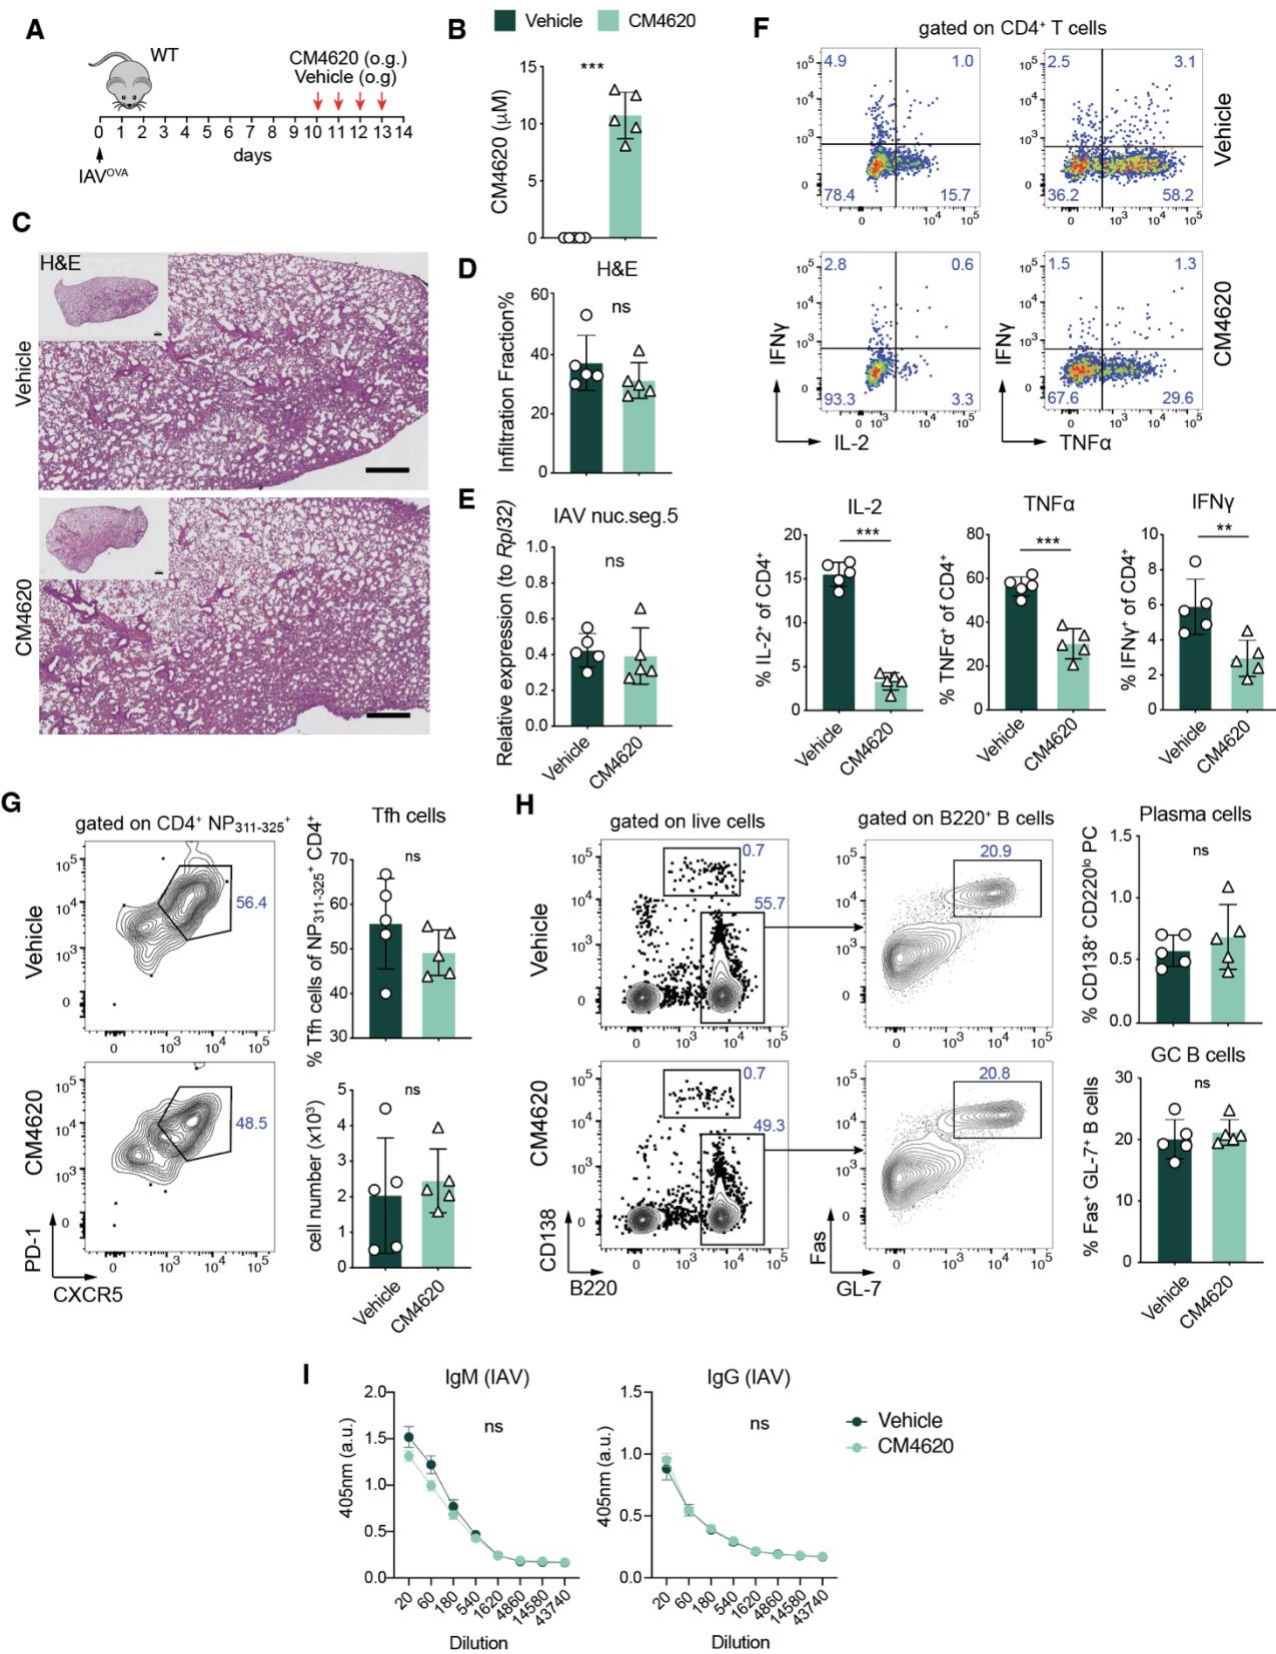

**Supplementary Figure 10. Pharmacological CRAC channel inhibition does not compromise adaptive immunity to influenza A virus infection.** **A**, Protocol used for infection of wildtype (WT) C57BL/6J mice with the x31 (H3N2) strain of influenza A virus (IAV). Mice were treated with 25 mg per kg

bodyweight of CM4620 or vehicle alone by oral gavage (o.g.) on four consecutive days and analyzed 14 days p.i. **B**, Concentrations of CM4620 in the serum of mice measured by LC-MS. **C**, Representative H&E stains of lung sections of mice. Scale bars represents 500  $\mu\text{m}$ . **D**, Percentage of lung area with leukocyte infiltration based on H&E stains in (C). **E**, Virus burdens in the lungs of mice treated with CM4620 or vehicle at day 14 p.i. measured by qRT-PCR of nuclear segment 5 of IAV. **F**, Frequencies of CD4<sup>+</sup> T cells producing IL-2, IFN- $\gamma$  and TNF- $\alpha$ . T cells were isolated from the lungs of mice at day 14 p.i. and restimulated *in vitro* with PMA / ionomycin for 4h and analyzed by flow cytometry. **G**, Frequencies and total numbers of PD-1<sup>+</sup> CXCR5<sup>+</sup> T follicular helper (Tfh) cells specific for nuclear protein (NP) antigen of IAV that were isolated from the mediastinal lymph nodes (mLNs) of mice 14 days p.i. **H**, Frequencies of B220<sup>+</sup> GL-7<sup>+</sup> Fas<sup>+</sup> germinal center (GC) B cells and B220<sup>int</sup> CD138<sup>+</sup> plasma cells (PC) in the mLNs of mice. **I**, Serum levels of IAV-specific IgM and IgG antibodies at day 14 p.i. measured by ELISA. Data in D-I are the mean  $\pm$  SEM of 5 mice per cohort from 2 independent experiments. Statistical analysis by unpaired Student's t-test: \*\*\* $p < 0.001$ ; \*\* $p < 0.01$ ; \* $p < 0.05$ . ns, not significant.



## SUPPLEMENTARY TABLES

**Supplementary Table 1. Primers for realtime PCR.**

| Gene                                  | Forward primer             | Reverse primer           |
|---------------------------------------|----------------------------|--------------------------|
| <i>Il4</i>                            | CGAGCTCACTCTCTGTGGTG       | TGAACGAGGTCACAGGAGAA     |
| <i>Il13</i>                           | CACACTCCATACCATGCTGC       | TGTGTCTCTCCCTCTGACCC     |
| <i>Il5</i>                            | CCCACGGACAGTTTGATTCT       | GCAATGAGACGATGAGGCTT     |
| <i>Il6</i>                            | TAGTCCTTCCTACCCCAATTTCC    | TTGGTCCTTAGCCACTCCTTC    |
| <i>Tnfa</i>                           | AGGGTCTGGGCCATAGAACT       | CCACCACGCTCTTCTGTCTAC    |
| <i>Il33</i>                           | ACTATGAGTCTCCCTGTCCTG      | ACG TCA CCCCTTTGA AGC    |
| <i>Mcp1 (Ccl2)</i>                    | TGATCCCAATGAGTAGGCTGGAG    | ATGTCTGGACCCATTCTTCTTG   |
| <i>Mcp3 (Ccl7)</i>                    | CCTGGGAAGCTGTTATCTTCAA     | TGGAGTTGGGGTTTTTCATGTC   |
| <i>Eotaxin1 (Ccl11)</i>               | GCGCTTCTATTCTGCTGCTCACGG   | GTGGCATCCTGGACCCACTTCTTC |
| <i>Eotaxin2 (Ccl24)</i>               | GCCTCCTTCTCCTGGTAGCCTGC    | ATGGCCCTTCTTGGTGATGAAGAT |
| <i>Rantes (Ccl5)</i>                  | ATGAAGATCTCTGCAGCTGCCCT    | ACTTCTTCTCTGGGTTGGCACACA |
| <i>M2 protein (Ion channel)</i>       | AAGACCAATCCTGTACCTCTGA     | CAAAGCGTCTACGCTGCAGTCC   |
| <i>M1 protein (Matrix)</i>            | CCGAGATCGCACAGAGACTTGAAGAT | GGCAAGTGCACCAGCAGAATAACT |
| <i>Segment 5 (nucleoprotein)</i>      | GCACGGTCAGCACTCATTCTGAG    | GACCAAATGAAAACCCAGCTCA   |
| <i>Segment 7 (pre-mRNA M1 and M2)</i> | AGCCAAGTGTACAGCCTAATC      | CTTCAAATGCGGCAGAATGG     |
| <i>Segment 7 (pre-mRNA M1 and M2)</i> | CAGATGGAGACTGATGGAGAAC     | GGTGACATTTGGATGTAGAATC   |
| <i>Gata3</i>                          | AGGATGTCCCTGCTCTCCTT       | GCCTGCGGACTCTACCATAA     |
| <i>Irf4</i>                           | GCAATGGGAACTCCGACAGT       | CAGCGTCCTCCTCACGATTGT    |
| <i>Batf</i>                           | GCGTTCTGTTTCTCCAGGTC       | AGAGAGAAGAATCGCATCGC     |
| <i>Ccna2</i>                          | GTGGTGATTCAAACTGCCA        | AGAGTGTGAAGATGCCCTGG     |
| <i>Mcm6</i>                           | TGCACGAGCCTCTTCCCTACT      | TCCCGCATGTCCATCTTATCA    |

|             |                        |                        |
|-------------|------------------------|------------------------|
| <i>Bub1</i> | AGAATGCTCTGTCAGCTCATCT | TGTCTTCACTAACCCACTGCT  |
| <i>Cdk1</i> | AGAAGGTACTTACGGTGTGGT  | GAGAGATTTCCCGAATTGCAGT |

**Supplementary Table 2. Antibodies for flow cytometry.**

| <b>Antigen</b>     | <b>Manufacturer</b> | <b>Clone</b> | <b>Conjugation</b> |
|--------------------|---------------------|--------------|--------------------|
| B220               | eBioscience         | RA3-6B2      | FITC               |
| B220               | eBioscience         | RA3-6B2      | PB                 |
| B220               | Biologend           | RA3-6B2      | BV510              |
| BCL6               | eBioscience         | BCL-DWN      | PE                 |
| BrdU               | eBioscience         | BU20A        | FITC               |
| CCR7               | eBioscience         | 4B12         | APC                |
| CD11b              | eBioscience         | M1/70        | PE-Cy7             |
| CD11c              | Biologend           | N418         | FITC               |
| CD16/32 (Fc block) | eBioscience         | 93           | Non-conjugated     |
| CD16/32 (Fc block) | BioXcell            | 2.4G2        | Non-conjugated     |
| CD38               | eBioscience         | 90           | APC                |
| CD38               | Biologend           | T10          | PE-Cy7             |
| CD4                | eBioscience         | GK1.5        | PB                 |
| CD4                | Biologend           | GK1.5        | APC-Cy7            |
| CD4                | eBioscience         | GK1.5        | PE-Cy7             |
| CD44               | eBioscience         | IM7          | FITC               |
| CD44               | eBioscience         | IM7          | PB                 |
| CD44               | eBioscience         | IM7          | PerCP-Cy5.5        |
| CD44               | eBioscience         | IM7          | PE-Cy7             |
| CD62L              | Biologend           | Mel-14       | PerCP-Cy5.5        |
| CD69               | eBioscience         | H1.2F3       | FITC               |
| CD69               | eBioscience         | H1.2F3       | PE                 |
| CD8                | eBioscience         | 53-6.7       | PB                 |
| CD8                | eBioscience         | 53-6.7       | APC                |
| CD8                | eBioscience         | 53.6-7       | PE                 |
| CD95(Fas)          | BD Bioscience       | Jo2          | BV421              |
| CD138              | Biologend           | 281-2        | PE                 |
| CXCR5              | eBioscience         | SPRCL5       | PerCP-eFluor™ 710  |
| CXCR5              | Biologend           | L138D7       | BV421              |
| FOXP3              | eBioscience         | FJK-16s      | PE                 |
| GATA3              | eBioscience         | TWAJ         | eFluor® 660        |

|                                                         |                   |                     |                |
|---------------------------------------------------------|-------------------|---------------------|----------------|
| GL-7                                                    | Biolegend         | GL7                 | Alexa-Fluor647 |
| GL-7                                                    | Biolegend         | GL7                 | FITC           |
| GR-1 (Ly6G)                                             | Biolegend         | 1A8                 | Alexa-Fluor647 |
| IFN- $\gamma$                                           | eBioscience       | XMG1.2              | APC            |
| IFN- $\gamma$                                           | Biolegend         | XMG1.2              | PE             |
| IFN- $\gamma$                                           | eBioscience       | XMG1.2              | PE             |
| IFN- $\gamma$                                           | Biolegend         | XMG1.2              | BV421          |
| IL-10                                                   | Biolegend         | JES5-16E3           | FITC           |
| IL-13                                                   | eBioscience       | eBio13A             | Alexa-Fluor488 |
| IL-17A                                                  | Biolegend         | TC11-18H10.1        | FITC           |
| IL-17A                                                  | eBioscience       | eBio17B7            | PerCP-Cy5.5    |
| IL-2                                                    | eBioscience       | JES6-5H4            | FITC           |
| IL-2                                                    | Biolegend         | JES6-5H4            | PE             |
| IL-21                                                   | eBioscience       | mhalx21             | PE             |
| IL-4                                                    | eBioscience       | 11B11               | PE             |
| IL-5                                                    | Biolegend         | TRFK5               | PE             |
| IRF4                                                    | eBioscience       | 3E4                 | eFluor® 660    |
| MHC II                                                  | eBioscience       | 25UG                | PB             |
| PD-1                                                    | Biolegend         | 29F.1A12            | PE-Cy7         |
| PD-1                                                    | eBioscience       | J43                 | APC            |
| Siglec-F                                                | BD Biosciences    | E50-2440            | PE             |
| T-bet                                                   | eBioscience       | eBio4B10            | PerCP-Cy5.5    |
| T-bet                                                   | eBioscience       | eBio4B10            | PE             |
| TNF- $\alpha$                                           | eBioscience       | MP6-XT22            | APC            |
| Rat IgG1, $\kappa$ Isotype<br>Ctrl (for IL-13)          | eBioscience       | eBRG1               | Alexa-Fluor488 |
| Rat IgG1, $\kappa$ Isotype<br>Ctrl (for IL-4)           | eBioscience       | eBRG1               | PE             |
| Rat IgG1, $\kappa$ Isotype<br>Ctrl (for TNF- $\alpha$ ) | eBioscience       | eBRG1               | APC            |
| Rat IgG1, $\kappa$ Isotype<br>Ctrl (for IFN- $\gamma$ ) | Biolegend         | RTK2071             | PE             |
| Rat IgG2b, $\kappa$ Isotype<br>Control (for GATA3)      | eBioscience       | eB149/10H5          | eFluor 660     |
| ORAI1 (custom-made)                                     | Yenzym Antibodies | Polyclonal (YZ6856) | Non-conjugated |
| Normal rabbit IgG                                       | Cell Signaling    | Polyclonal (2729)   | Non-conjugated |
| Goat anti rabbit IgG                                    | Thermo Fisher     | Polyclonal (A21244) | Alexa-Fluor647 |

**Supplementary Table 3. MHC class II tetramers for flow cytometry.**

| <b>Tetramer</b>                      | <b>Source</b>                 | <b>Model</b> | <b>Conjugation</b> |
|--------------------------------------|-------------------------------|--------------|--------------------|
| I-A(b)AQVYSLIRPNENPAHK<br>(NP311-25) | NIH Tetramer<br>Core Facility | IVA          | PE                 |
| I-A(b)AQVYSLIRPNENPAHK<br>(NP311-25) | NIH Tetramer<br>Core Facility | IVA          | Alexa-Fluor647     |
| I-A(b) / CQIYPPNVNKI<br>(Derp1)      | NIH Tetramer<br>Core Facility | HDM          | APC                |
| I-A(b) / CQIYPPNVNKI<br>(Derp1)      | NIH Tetramer<br>Core Facility | HDM          | PE                 |
